# Supplementary material for: Omega-3 fatty acids: physiology, biological sources and potential applications in supportive cancer care
Source: Springer Nature journal article supplement (doi:10.1007/s11101-013-9309-1), 2013-06-22
Supplement: MOESM5 [file 11101_2013_9309_MOESM5_ESM.doc]

Supplementary Table 5

| **Reference** | **Study design** | **Study population - Sample size - Therapy intent** | ***n*-3 PUFA intervention/composition** | **Endpoint(s)** | **Results** |
| --- | --- | --- | --- | --- | --- |
|  | RCT | Postmenopausal women at increased risk for breast cancer (≥25% breast density)  (n=46) | E1: Raloxifene 60mg  E2: Raloxifene 30mg  E3: n-3 FA (Lovaza) 4g  E4: Lovaza 4g + Raloxifene 30mg  C: no intervention  Duration: 24m | Reduction in breast density | The combination of Lovaza and Raloxifene is a feasible strategy |
|  | RCT, double-blind | Recurrent breast cancer  Stage IA, IB, II, IIIA, IIIB, IIIC breast cancer  (n=40) | E: n-3 FA supplement  C: placebo  Duration: 6m | Pain score at 6m, based on FACT-B/ES | ongoing |
|  | RCT | Women at high risk of developing Breast cancer (n=80) | E: n-3 FA supplement  C: placebo  Duration: 12m | Mammographic breast density | ongoing |
|  | RCT, open label | Prostate cancer patients undergoing radical prostatectomy (n=70) | E: fish oil + vit E + low-fat diet  C: standard western diet  Duration: 4w | IGF-1 and IGFBP as biomarkers for prostate cancer | ongoing |
|  | RCT, double blind | Favorable-risk prostate cancer  (n=69) | E: 30mg lycopene + 3g fish oil (1.098mg EPA+549mg DHA)  C: placebo  Duration: 3m | Prostate tissue gene expression profiles (IGF-1, COX-2) | Intervention with lycopene or fish oil did not significantly change IGF-1 or COX-2 gene expression in prostate tissue |
|  | RCT, double blind | Patients at risk of developing prostate cancer (n=144) | E1: green tea catechin + fish oil  E2: green tea catechin + placebo  E3: fish oil + placebo  C: placebo + placebo  Duration: 20w | Fatty acid synthase activity in the prostate | ongoing |
|  | Prospective cohort, single arm | Advanced prostate cancer  (n=NR) | fish oil  Duration: 12m | N-3 FA levels in serum and fat biopsies  Tolerability of n-3 FA | ongoing |
|  | RCT, double blind | Females at risk of skin cancer  (n=90) | E: n-3 PUFA (4g)  C: gelatine  Duration: 3m | Degree of nickel induced contact hypersensitivity | ongoing |
|  | RCT, double blind | Patients with polymorphisms associated with increased prostate cancer risk (rs174535 (GG, GT, TT)) (n=150) | E: 1395mg EPA+1125mg DHA (Lovaza)  C: oleic acid  Duration: 6m | Rectal epithelial cell proliferation | ongoing |
|  | Prospective cohort, single arm | Postmenopausal women on aromatase inhibitors after breast cancer  (n=40) | E: 4g Lovaza  Duration: 3w | Serum free and total estradiol levels | ongoing |
|  | RCT, double blind | Stage I-III breast cancer on anastrozole, letrozole, exemestane  (n=40) | E: fish oil (4.3g)  C: placebo  Duration: 6m | Pain score at 6m, based on FACT-B/ES | ongoing |
|  | RCT, double blind | Breast cancer patients undergoing chemotherapy  (n=52) | E: fish oil  C: corn oil pearls  Duration: 3m | Chemotherapy-induced neuropathy and inflammation | ongoing |
|  | RCT, double-blind | Gastrointestinal cancer patients undergoing surgery (n=63) | E: fish oil lipid emulsions  C: control lipid emulsion  Through perioperative peripheral infusion  Duration: 3d | Post-op concentration of inflammatory mediators, leukocyte function, length of hospital (ICU) stay | Short-term pre-operative infusion of FO alone improves the post-operative immune response of GI cancer patients without significantly changing post-operative infections or length of ICU and hospital stay |
|  | RCT, double blind | Colorectal cancer patients  (n=148) | E: supportan  C: placebo | Post-surgical infectious complications, 30-day mortality | ongoing |
|  | RCT, double-blind | Oesophageal cancer  (N=53)  Undergoing surgery | E: Perioperative EPA enriched enteral nutrition (2.2g EPA)  Duration: 5d pre-operatively, 21d postoperatively | Metabolic  Nutritional  Immune-inflammatory response  Postoperative complications | No difference in incidence of major complications  LBM maintenance in E  Significant attenuated stress response in E |
|  | RCT, double-blind | (Post)menopausal women suffering from hot flashes  (n=100) | E: 2 capsules n-3 FA  C: 2 capsules placebo  Duration: 3m | Decrease in severity of hot flashes | ongoing |
|  | RCT, double blind | Postmenopausal women (n=355) | E1a: yoga + n-3 PUFA  E1b: yoga + placebo  E2a: supervised aerobic exercise + n-3 PUFA  E2b: supervised aerobic exercise + placebo  E3a: usual activity + n-3 PUFA  E3b: usual activity + placebo  Duration: 12w | Frequency of daily hot flashes  Adherence to exercise training | Methodology is challenging but feasible |
|  | RCT, double-blind | Women at increased risk for breast cancer  (n=231) | E: secoisolariciresinol (flaxseed lignan)  C: placebo  Duration: 12m | Proportion of breast epithelial cells expressing benign breast tissue | ongoing |
|  | Cross-sectional | Women with breast cancer (n=683)  Healthy controls  (n=611) | No intervention | Usual dietary intakes of lignans  Tumor characteristics | higher lignan intakes were associated with lower risks of breast cancer with more favorable prognostic characteristics |
|  | Randomised, single blind | Prostate cancer patients  (n=NR) | ALA-rich diet  Duration: 12m | Serum PSA  Atrial fibrillation | ongoing |
|  | Prospective cohort, single arm | Men scheduled to undergo prostate biopsy  (n=15) | low-fat (less than 20% kcal), flaxseed-supplemented (30 g/day) diet  duration: 6months | PSA  Testosterone  Cholesterol | Significant decrease in PSA and cholesterol, not in testosterone |
|  | Randomised, single blind | Women with benign breast disease  (n=256) | E1: tamoxifen  E2: evening primrose oil  Duration: 3m | Reduction in lump size  Reduction in mastalgia | ongoing |
|  | RCT, double blind | Postmenopausal women  (n=200) | E: Femarelle (322mg soy extract + 108mg flaxseed)  C: placebo (430mg microcrystalline cellulose)  Duration: 12w | Average number and severity of hot flashes | ongoing |
|  | Prospective cohort, single arm | Women not taking estrogen therapy (n=30) | E: crushed flaxseed (40g daily)  Duration: 6 weeks | Hot flash scores (through daily hot flash diary) | The mean reduction in daily hot flash frequency was 50% (median reduction 50%) |
|  | RCT  (phase III) | Postmenopausal women with or without breast cancer (n=188) | E: flaxseed bar (providing 410 mg of lignans)  C: placebo bar  Duration: 6 weeks | Difference in hot flash activity between baseline and the last treatment week | The mean hot flash score was reduced 4.9 in the flaxseed group and 3.5 in the placebo group (P = 0.29) |

*Abbreviations: E: experimental, C: control, FACT-B/ES: functional assessment of cancer therapy – breast cancer/endocrine subscale, IGF-1: insulin-like growth factor-1, IGFBP: insulin-like growth factor binding-protein, COX-2: cyclooxygenase-2, ICU: intensive care unit, FO: fish oil, PSA: prostate specific antigen.*
